# Supplementary material
Source: publisher figshare collection journal article supplement (https://sage.figshare.com/ndownloader/files/18057713)
Supplement: Supplementary file 1 [file 18057713]

## Supplementary File 1.

*Adaptive Daily Rhythm Atmosphere schedule for Toronto Rehabilitation Institute (TRI)*

|   | Time          | Activity       | Description                                                                                                                                                                                                                                                                  |
|---|---------------|----------------|------------------------------------------------------------------------------------------------------------------------------------------------------------------------------------------------------------------------------------------------------------------------------|
| 1 | 22:00-7:30    | Sleep          | All lights and screen turned off to enhance a healthy sleep pattern.                                                                                                                                                                                                         |
| 2 | 07:30 – 08:00 | Wake-up        | The room prepares the patient for a gentle wake up by slowly increasing the light intensity in the room, mimicking a sunrise. When the light intensity is at its final level, a nature view slide show appears on the screen and an audio file with singing birds is played. |
| 3 | 08:00 – 10:00 | Breakfast      | To eliminate distraction during breakfast, a still picture of a nature view is displayed and the audio is muted. The artificial lighting is increased to allow proper eating.                                                                                                |
| 4 | 10:00 – 12:00 | Clinical care  | The light intensity reaches its maximum to allow the medical staff to work with the patient and the patient to feel aroused. During this phase nothing will be shown on the screen to allow the patient to concentrate on the medical treatment.                             |
| 5 | 12:00 – 13:00 | Lunch          | The light is slowly reduced from maximum level, the screen projects a still picture and audio is still turned off to allow patient to concentrate on eating.                                                                                                                 |
| 6 | 13:00 – 14:00 | Afternoon rest | The screen displays a video of a river with a mountain view and river sounds to allow for relaxation and masking of hospital sounds.                                                                                                                                         |
| 7 | 14:00 – 20:00 | Visiting hours | To create a cozy and pleasant atmosphere for visitors, the lights from the light coves will project coloured light and the screen will display a nature picture.                                                                                                             |
| 8 | 20:00 - 22:00 | Evening rest   | Light intensity is reduced. A movie with a sunset is shown and restful sounds are played to enhance relaxation and mask hospital sounds.                                                                                                                                     |
